# Supplementary material for: Comparing Circadian Dynamics in Primary Derived Stem Cells from Different Sources of Human Adult Tissue
Source: Hindawi journal article supplement (doi:10.1155/2017/2057168), 2017-01-01
Supplement: f1 [file 2057168.f1.pdf]

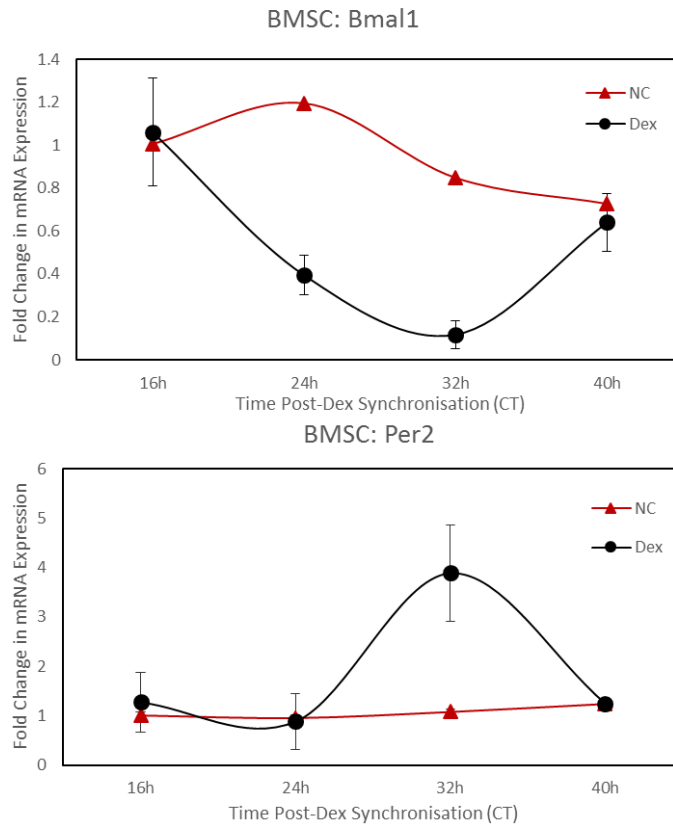

**Supplementary Fig 1. Comparison of temporal clock gene expression between unsynchronised and dexamethasone-synchronised BMSCs.** Quantitative RT-PCR analyses overlays of temporal clock gene expression in dexamethasone synchronised and unsynchronised (negative control) samples (NC). Data is expressed as the mean of  $\Delta Ct \pm SEM$  calculated from the Ct value of each gene relative to the 16 h time point and normalised against the housekeeping gene *GAPDH*. Bars represent means  $\pm SEM$  of 2-3 independent experiments.

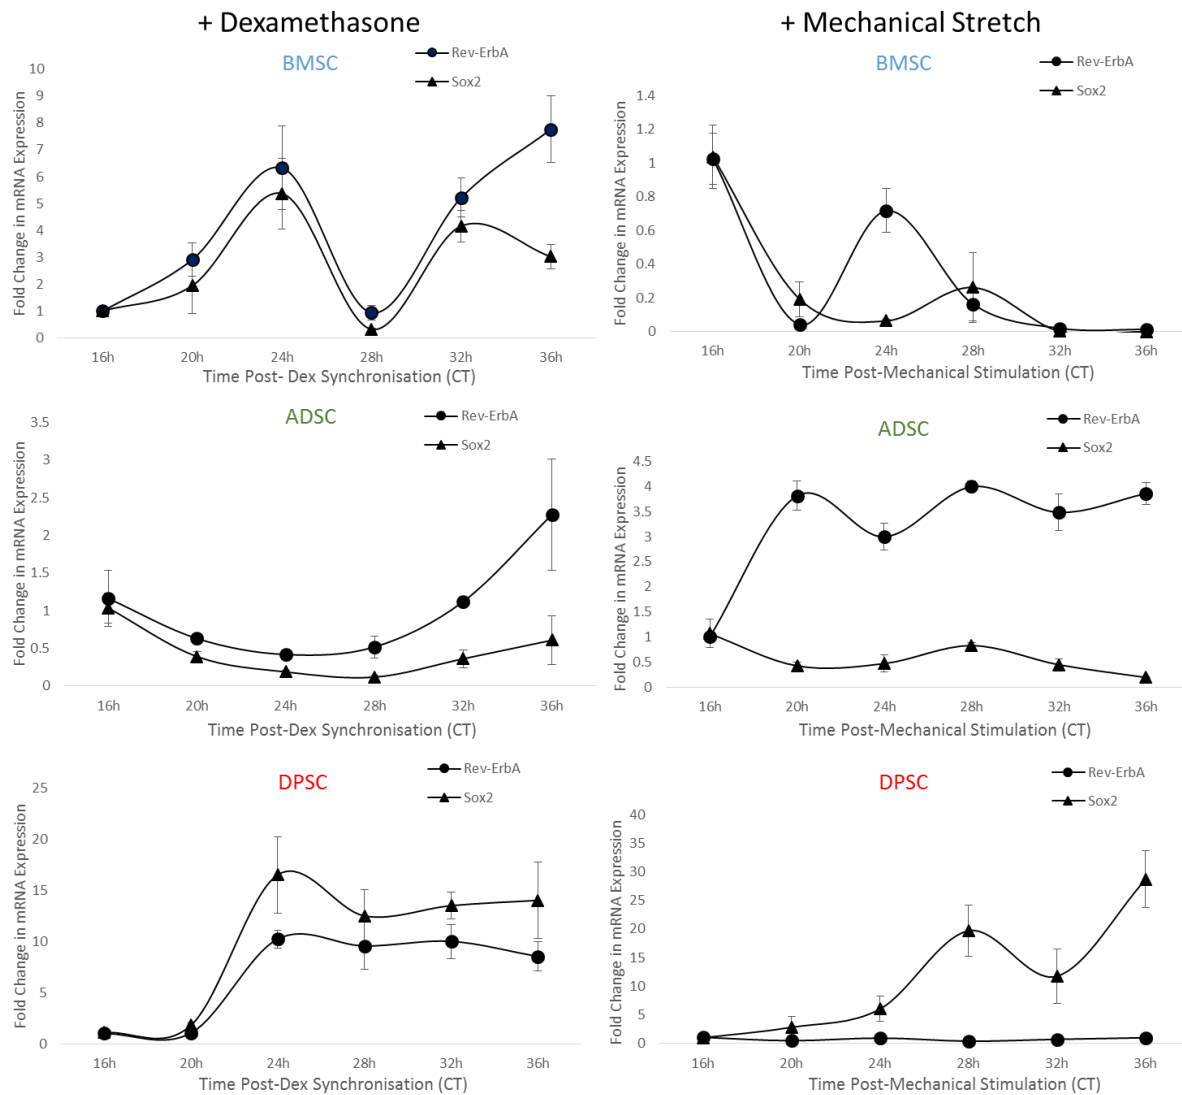

**Supplementary Fig 2. Comparison of the cyclical expression of *Rev-ErbA* and *Sox2* following synchronisation by dexamethasone or rhythmic mechanical stretch.** Quantitative RT-PCR analyses overlays of *Rev-ErbA* and *Sox2* temporal gene expressions over 1 circadian cycle (16 h to 36 h) following synchronisation with dexamethasone or mechanically. Data is expressed as the mean of  $\Delta Ct \pm SEM$  calculated from the Ct value of each gene relative to the 16 h time point and normalised against the housekeeping gene *GAPDH*. Bars represent means  $\pm SEM$  of 3 independent experiments.
